# Supplementary material
Source: MDPI journal article supplement (https://www.mdpi.com/1424-2818/14/8/586)
Supplement: s1 [file s1]

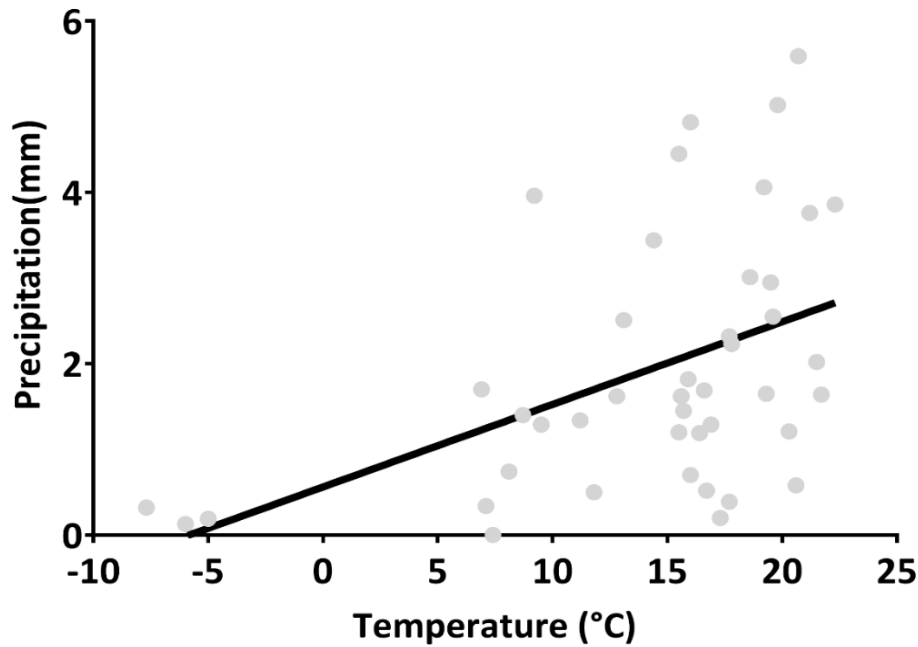

**Figure S1.** Correlation between the average daily temperature and precipitation of each trapping interval between two successive trapping sessions (Pearson's  $r = 0.46$ ,  $p = 0.002$ ). Data from Zhenglan Qi Meteorological Station (ID.54205), Inner Mongolia, China, during 2014 - 2017.

**Table S1.** Modelling of recapture ( $p$ ), survival ( $\phi$ ) and recruitment ( $f$ ): the time scale and sex variation by the Cormack–Jolly–Seber (CJS) and Jolly–Seber (JS) models, respectively for Mongolian gerbils (*Meriones unguiculatus*) at Houhatai, Inner Mongolia, China from April 2014 through September 2017.

| Model                                                                                                                                                                   | AICc            | $\Delta$ AICc | AICc Weight (w) | Model Likelihood | Par       | Deviance       |
|-------------------------------------------------------------------------------------------------------------------------------------------------------------------------|-----------------|---------------|-----------------|------------------|-----------|----------------|
| step 1: Modelling half-monthly temporal and sex variation for survival probabilities and recapture probabilities by CJS models. g=sex, t = half-month trapping session. |                 |               |                 |                  |           |                |
| $\phi(t) p(t)$                                                                                                                                                          | <b>2219.419</b> | <b>0.000</b>  | <b>0.998</b>    | <b>1.000</b>     | <b>62</b> | <b>863.717</b> |
| $\phi(t) p(g^*t)$                                                                                                                                                       | 2232.071        | 12.650        | 0.002           | 0.002            | 79        | 838.449        |
| $\phi(g^*t) p(t)$                                                                                                                                                       | 2240.908        | 21.490        | 0.000           | 0.000            | 89        | 824.497        |
| $\phi(g^*t) p(g^*t)$                                                                                                                                                    | 2257.954        | 38.540        | 0.000           | 0.000            | 106       | 801.952        |
| $\phi(.) p(t)$                                                                                                                                                          | 2329.248        | 109.830       | 0.000           | 0.000            | 37        | 1027.510       |
| $\phi(g) p(t)$                                                                                                                                                          | 2331.366        | 111.950       | 0.000           | 0.000            | 38        | 1027.510       |
| $\phi(t) p(g)$                                                                                                                                                          | 2339.115        | 119.700       | 0.000           | 0.000            | 38        | 1035.258       |
| $\phi(t) p(.)$                                                                                                                                                          | 2340.285        | 120.870       | 0.000           | 0.000            | 36        | 1040.663       |
| $\phi(.) p(g^*t)$                                                                                                                                                       | 2343.193        | 123.770       | 0.000           | 0.000            | 58        | 996.267        |
| $\phi(g) p(g^*t)$                                                                                                                                                       | 2344.405        | 124.990       | 0.000           | 0.000            | 59        | 995.290        |
| $\phi(g^*t) p(g)$                                                                                                                                                       | 2352.768        | 133.350       | 0.000           | 0.000            | 62        | 997.067        |
| $\phi(g^*t) p(.)$                                                                                                                                                       | 2355.859        | 136.440       | 0.000           | 0.000            | 61        | 1002.357       |

|                |          |         |       |       |   |          |
|----------------|----------|---------|-------|-------|---|----------|
| $\phi(.) p(g)$ | 2487.402 | 267.980 | 0.000 | 0.000 | 3 | 1255.809 |
| $\phi(g) p(g)$ | 2489.319 | 269.900 | 0.000 | 0.000 | 4 | 1255.714 |
| $\phi(.) p(.)$ | 2491.204 | 271.780 | 0.000 | 0.000 | 2 | 1261.620 |
| $\phi(g) p(.)$ | 2493.190 | 273.770 | 0.000 | 0.000 | 3 | 1261.597 |

step 2: Modelling half-monthly temporal ( $t$ ) variation for survival probabilities, recapture probabilities and recruitment by JS model. Set of candidate models based on Pradel (1996)

|                                       |                 |              |              |              |           |                |
|---------------------------------------|-----------------|--------------|--------------|--------------|-----------|----------------|
| <b><math>\phi(t) p(t) f(t)</math></b> | <b>4147.851</b> | <b>0.000</b> | <b>1.000</b> | <b>1.000</b> | <b>82</b> | <b>899.656</b> |
| $\phi(t) p(t) f(g^*t)$                | 4174.546        | 26.690       | 0.000        | 0.000        | 99        | 887.203        |
| $\phi(t) p(t) f(.)$                   | 4296.881        | 149.030      | 0.000        | 0.000        | 64        | 1088.996       |
| $\phi(t) p(t) f(g)$                   | 4296.945        | 149.090      | 0.000        | 0.000        | 65        | 1086.851       |

Note: AICc and  $\Delta AICc$  are Akaike information criterion corrected for small sample size and difference in AICc between the model and the most parsimonious model. Models in bold stand were selected in each step and used as starting point for the subsequent step. Par is the number of identifiable parameters
